# Supplementary material
Source: PubMed Central journal article supplement (PMC3808595)
Supplement: 1309071110_pnas.201309071SI.pdf [file 1309071110_pnas.201309071SI.pdf]

# Supporting Information

Kalayil et al. 10.1073/pnas.1309071110

## SI Methods

**Expression and Purification.** Expression and purification of PmCaiT have been described previously (1). Briefly, *Escherichia coli* BL21 (DE3) pLysS cells were transformed with pET-15b plasmids carrying CaiT from *Proteus mirabilis*. The transformed cells were grown in 2\*Yeast extract and Tryptone medium, induced with 0.5 mM IPTG (Isopropyl  $\beta$ -D-1-thiogalactopyranoside) at an OD of 0.6–0.8 at 30 °C and harvested after 4 h. The cells were lysed using a microfluidizer. Cell debris was removed by low-speed centrifugation (10,000  $\times$  g, 4 °C, 30 min) followed by high-speed centrifugation (125,000  $\times$  g, 4 °C, 1:30 h) to obtain the membrane fraction. The membranes were homogenized in 25 mM Hepes at pH 7.5, 50 mM NaCl, 20% (vol/vol) glycerol, and 2 mM TCEP (*tris*(2-carboxyethyl)phosphine), flash-frozen, and stored at –80 °C until further use. For crystallization, the membranes were solubilized overnight at 4 °C with 2% (wt/vol) cymal-5 (5-Cyclohexyl-1-Pentyl- $\beta$ -D-Maltoside), followed by high-speed centrifugation (125,000  $\times$  g, 4 °C, 1:30 h) to remove detergent-insoluble material. For transport assays and fluorescence binding studies, the membranes were solubilized using 2% (wt/vol) DDM *n*-Dodecyl  $\beta$ -D-maltoside for 2 h at 4 °C. The supernatant was loaded onto a Ni<sup>2+</sup>-chelating Sepharose column (Amersham), and the protein was eluted using 25 mM Hepes at pH 7.5, 50 mM NaCl, 1 mM TCEP, 0.2% cymal-5/0.05% DDM, and 200 mM Imidazole. The buffer was exchanged on a PD-10 Sephadex column (GE Healthcare) to 25 mM Hepes, 25–50 mM NaCl, 1 mM TCEP, and 0.2% cymal-5 for crystallization and 50 mM Tris, 25–30 mM KCl, 1 mM TCEP, and 0.05% DDM prepared with low-sodium water for transport assays and binding studies. For crystallization, the purified protein was concentrated to 3–5 mg/mL (Vivaspin 100 kDa, Sartorius). All mutant constructs of PmCaiT were generated using the QuikChange Site Directed Mutagenesis kit (Stratagene), according to the manufacturer's instructions. The mutant proteins were purified by the same protocol as for wild-type.

**R262E Crystallization and Structure Determination.** The purified protein solution was clarified by centrifugation (100,000  $\times$  g, 4 °C, 30 min) before crystallization. Crystals were grown at 4 °C by vapor diffusion in hanging drops of 2  $\mu$ L protein solution and 1  $\mu$ L reservoir buffer [50 mM Ca<sup>2+</sup>-acetate at pH 4.5–5.5, 0–200 mM NaCl, 19–30% (vol/vol) PEG400]. Crystals appeared after 2–3 d and were frozen directly in liquid nitrogen with 35% (vol/vol) PEG400 as a cryoprotectant. The crystals diffracted isotropically to a resolution of 3.3 Å and belonged to the space group H3, with one molecule in the asymmetric unit. Data were processed using the XDS package (2), and the structure was solved by molecular replacement with wild-type PmCaiT (2WSW) in PHASER (3). The structure was refined with iterative rounds of manual rebuilding in COOT (4) and maximum-likelihood energy minimization and isotropic B-factor refinement in PHENIX (5). Superpositions of various crystal structures were performed on the DaliLite Server (6) or using Secondary-structure matching (SSM) superposition in COOT. All structure figures were generated with Pymol (7).

**Reconstitution and Transport Assay.** The purified protein was reconstituted into liposomes of *E. coli* polar lipid (Avanti), as described previously (1). Transport assays were performed as described earlier (1, 8). Briefly, proteoliposomes were preloaded with 50 mM Tris at pH 7.5, 1 mM TCEP, and 10 mM  $\gamma$ -butyrobetaine in two freeze–thaw cycles. After the second freeze–thaw cycle, the proteoliposomes were extruded 15 times through a 400-nm membrane filter (Avestin). The extraliposomal substrate was removed by ultracentrifugation (100,000  $\times$  g, 20 °C, 30 min), and proteoliposomes used for transport measurements were washed with buffer (50 mM Tris at pH 7.5, 1 mM TCEP). Substrate exchange was measured by recording the uptake of L-[*N*-methyl <sup>14</sup>C] carnitine hydrochloride (<sup>14</sup>C-L-carnitine, Perkin-Elmer) into proteoliposomes. Substrate uptake was initiated by 1- $\mu$ L aliquots of the proteoliposome suspension diluted into 200  $\mu$ L reaction buffer (50 mM Tris at pH 7.5, 1 mM TCEP) with the concentration of <sup>14</sup>C-L-carnitine (2.5  $\mu$ Ci/mL) kept at 40  $\mu$ M. In addition, 50 mM NaCl was always included in the reaction buffer for Na<sup>+</sup>-dependent uptake activity measurements performed with the R262 mutants. For membrane potential measurements, the proteoliposomes also were preloaded with 50 mM KCl, and the reaction buffer was supplemented with 1  $\mu$ M valinomycin and 50 mM NaCl. For transport kinetics measurements, the concentration of [<sup>14</sup>C]-L-carnitine was varied from 0.3 to 60  $\mu$ M. At various times, reaction was stopped by filtering aliquots of the reaction on a Millipore membrane filter (0.22  $\mu$ m), followed by washing with 3.5 mL of ice-cold Tris buffer (25 mM at pH 7.5). [<sup>14</sup>C]-L-carnitine uptake was determined with a TRI-CARB 1500 scintillation counter (Canberra-Packard).

**Fluorescence Binding Assay.** Binding of L-carnitine was measured by tryptophan fluorescence, as described previously (1, 8), with proteoliposomes diluted to 10  $\mu$ M, in 50 mM Tris at pH 7.5 and 1 mM TCEP with or without 50 mM NaCl, as indicated. The L-carnitine concentration was increased from 0.6 to 175  $\mu$ M. Data were fitted, and apparent *K*<sub>d</sub> values were obtained using GraphPadPrism.

**Homology Modeling.** CaiT from *P. mirabilis* was modeled using BetP in the closed [Protein Data Bank (PDB) code 4AIN, chain A] and outward-open (PDB code 4DOJ, chain B) conformation with Modeler 9.11 (9). Twenty models were generated for each conformation, and the five with lowest energy were further analyzed using MolProbity (10). Of these, the model chosen for further analysis had 93.7% and 90.5% of the residues in Ramachandran-favored regions, for closed and outward open conformations, respectively.

**Sequence Alignment.** The structures of LeuT type transporters with a high degree of structural similarity to the PmCaiT structure (PDB code 2WSW) were obtained on the Dali server (6). The rmsd of the structures varied from 2.2 to 4.4 Å. A multiple sequence alignment of these proteins was generated from the 3D alignment of protein structures with PDBeFold (SSM), and the resulting alignment was manually checked and corrected (11).

1. Jung H, et al. (2002) CaiT of *Escherichia coli*, a new transporter catalyzing L-carnitine/ $\gamma$ -butyrobetaine exchange. *J Biol Chem* 277(42):39251–39258.
2. Kabsch W (1993) Automatic processing of rotation diffraction data from crystals of initially unknown symmetry and cell constants. *J Appl Cryst* 26:795–800.
3. McCoy AJ, et al. (2007) Phaser crystallographic software. *J Appl Cryst* 40(Pt 4): 658–674.
4. Emsley P, Cowtan K (2004) Coot: model-building tools for molecular graphics. *Acta Crystallogr D Biol Crystallogr* 60(Pt 12 Pt 1):2126–2132.

5. Adams PD, et al. (2002) PHENIX: building new software for automated crystallographic structure determination. *Acta Crystallogr D Biol Crystallogr* 58(Pt 11):1948–1954.
6. Holm L, Rosenström P (2010) Dali server: conservation mapping in 3D. *Nucleic Acids Res* 38(Web Server issue):W545–9.
7. Delano WL (2002) *The PyMOL Molecular Graphics System* (DeLano Scientific, San Carlos, CA).
8. Schulze S, Köster S, Geldmacher U, Terwisscha van Scheltinga AC, Kühlbrandt W (2010) Structural basis of Na<sup>+</sup>-independent and cooperative substrate/product antiport in CaiT. *Nature* 467(7312):233–236.

9. Eswar N, Eramian D, Webb B, Shen M-Y, Sali A (2008) Protein structure modeling with MODELLER. *Methods Mol Biol* 426:145–159.
10. Davis IW, Murray LW, Richardson JS, Richardson DC (2004) MOLPROBITY: structure validation and all-atom contact analysis for nucleic acids and their complexes. *Nucleic Acids Res* 32(Web Server issue):W615-9.

11. Krissinel E, Henrick K (2004) Secondary-structure matching (SSM), a new tool for fast protein structure alignment in three dimensions. *Acta Crystallogr D Biol Crystallogr* 60(Pt 12 Pt 1):2256–2268.

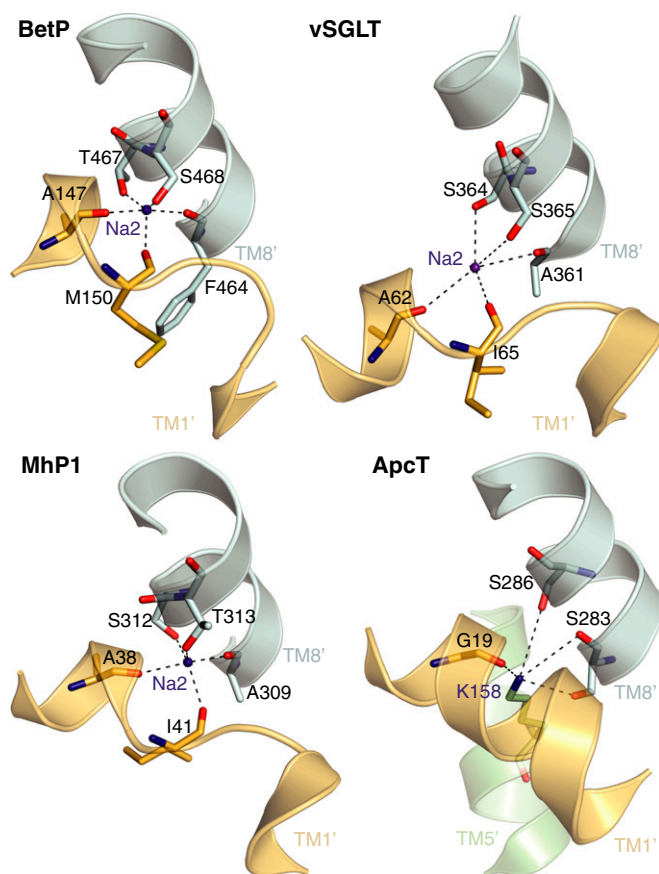

**Fig. S1.** Comparison of Na<sub>2</sub> sites in betaine transporter BetP, Na<sup>+</sup>/galactose symporter vSGLT, LeuT-type transporter Mhp1, and H<sup>+</sup>-coupled broad-specificity amino acid transporter ApcT. Structures were aligned with wild-type crystal structures of the carnitine transporter CaiT from *Proteus mirabilis* (PmCaiT) at an overall rmsd of 2.7 (BetP), 4.1 (vSGLT), 4.4 (Mhp1), and 3.4 Å (ApcT). PDB codes and chains are 4AIN\_B for BetP, 3DH4\_A for vSGLT, 2JLN\_A for Mhp1, and 3GIA\_A for ApcT. Even though alignments were better for the more similar conformations of BetP (4DOJ\_C, rmsd 2.2 Å), vSGLT (2XQ2\_A, rmsd 3.8 Å), and Mhp1 (2 × 79\_A, rmsd 3.6 Å), the Na<sub>2</sub>-bound conformations were used here for comparison of the Na<sub>2</sub> sites. The ApcT structure is rotated by 15° around the y axis for a better view of the K158 sidechain.

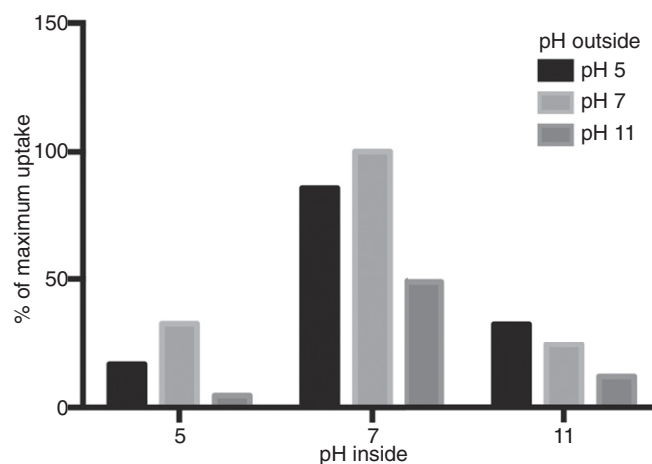

**Fig. S2.** pH-dependent L-carnitine uptake of wild-type PmCaiT. [ $^{14}\text{C}$ ] L-carnitine uptake activity was measured using proteoliposomes preloaded with 10 mM  $\gamma$ -butyrobetaine. The pH inside the proteoliposomes is denoted on the x axis, whereas the pH of the external medium differs for each bar, as indicated. The maximum L-carnitine uptake activity at pH  $7_{\text{in}}/7_{\text{out}}$  is taken as 100%, whereas the others are shown relative to the maximum activity.

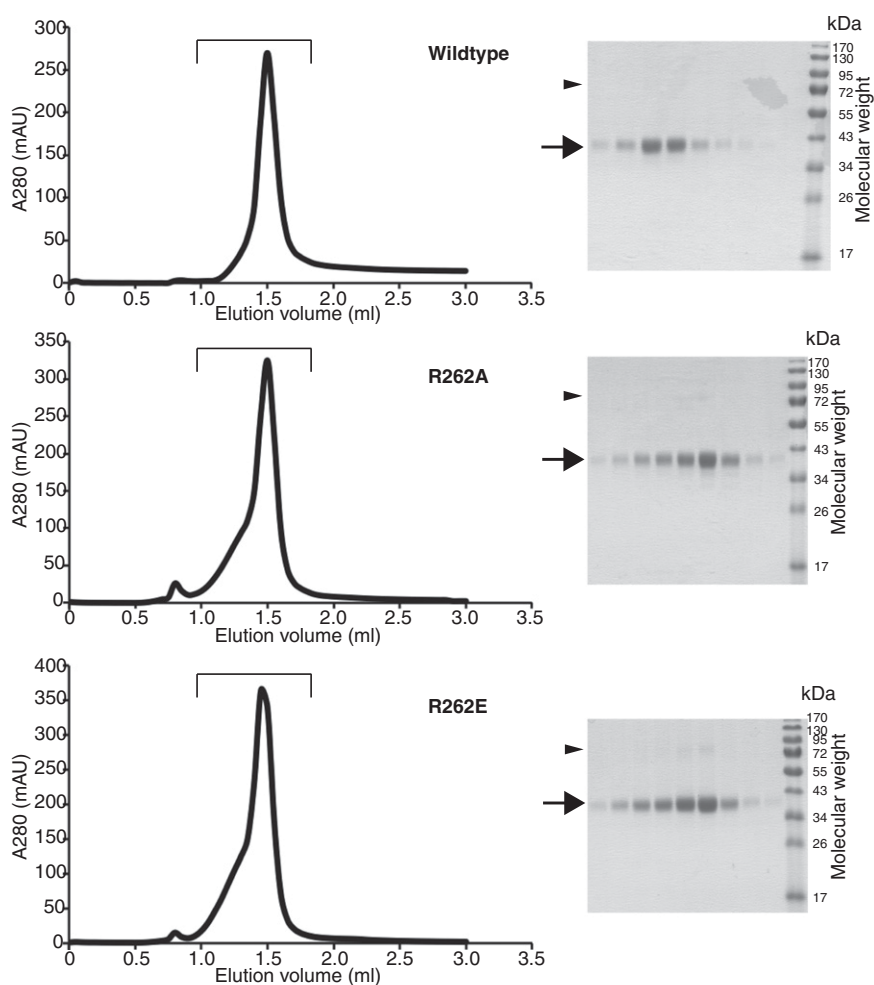

**Fig. S3.** Analytical size exclusion chromatography (SEC) of PmCaiT wild-type and arginine 262 (R262) mutants. Both the wild-type and the R262 mutants eluted at around 1.5 mL in a Superose-6 (3.2/30) column. The small peak in the void volumes is caused by aggregated protein. The right panel shows the SDS gel of the peak fraction obtained in SEC. The arrow indicates the monomeric protein, and the arrowhead indicates the trimer.



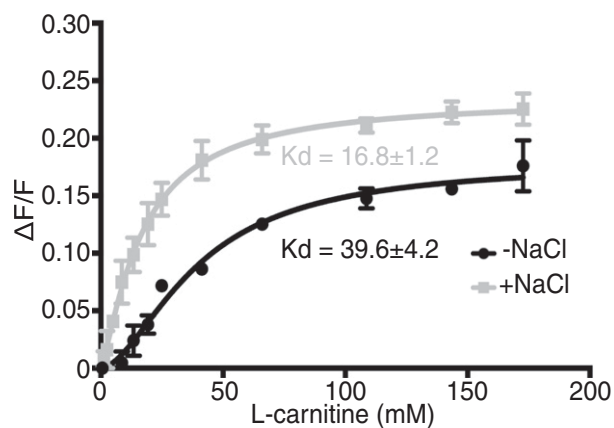

**Fig. 56.** Tryptophan fluorescence-based substrate-binding experiments with R262A reconstituted into proteoliposomes. The increase in tryptophan fluorescence with rising L-carnitine concentration was monitored in the presence and absence of 50 mM NaCl. The relative increase in fluorescence was plotted using a one-site binding model to obtain the apparent  $K_d$  values for substrate binding. All data points are the averages of three independent experiments, and the error bars indicate the SD of the measurements.

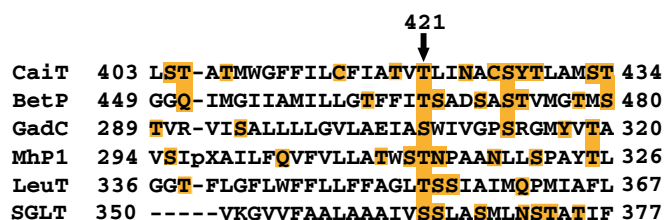

**Fig. 57.** Structure-based sequence alignment of TM8'. The alignment of several TM8' helices from LeuT-type transporters shows conservation of Thr/Ser residues corresponding to T421 in CaiT, which is important for stabilizing the unwound part of TM1' for substrate binding. Threonine and serine residues are highlighted in orange, and the black arrow shows the highly conserved Thr/Ser involved in Na<sub>2</sub> binding.

**Table S1. Data collection and refinement statistics**

|                                    | PmCaiT_R262E           |
|------------------------------------|------------------------|
| <b>Data collection and scaling</b> |                        |
| Wavelength, Å                      | 0.9795                 |
| Resolution range, Å                | 45.90–3.29 (3.55–3.29) |
| Space group                        | H3                     |
| Cell dimensions                    |                        |
| <i>a</i> , <i>b</i> , <i>c</i> ; Å | 129.1, 129.1, 160.7    |
| $\alpha$ , $\beta$ , $\gamma$ ; °  | 90, 90, 120            |
| Unique reflections                 | 15,128 (3,065)         |
| Multiplicity                       | 5.4 (5.5)              |
| Completeness, %                    | 99.5 (97.9)            |
| Mean <i>I</i> / $\sigma$ <i>I</i>  | 5.6 (2.0)              |
| <i>R</i> <sub>pim</sub>            | 0.14 (0.97)            |
| CC(1/2)                            | 0.988 (0.216)          |
| <b>Refinement</b>                  |                        |
| Number of reflections              | 14,980                 |
| Protein residues                   | 495                    |
| Number of atoms                    | 3,904                  |
| Protein                            | 3,893                  |
| Ligand (NM2)                       | 10                     |
| Water                              | 1                      |
| <i>R</i> <sub>work</sub>           | 0.2359 (0.2879)        |
| <i>R</i> <sub>work</sub>           | 0.2570 (0.3047)        |
| Ramachandran favored, %            | 93.7                   |
| Ramachandran outliers, %           | 0.4                    |
| RMS (bonds)                        | 0.003                  |
| RMS (angles)                       | 0.800                  |
| Average B-factors                  |                        |
| Protein                            | 53.5                   |
| Ligand                             | 74.8                   |
| Solvent                            | 16.9                   |

Statistics for the highest-resolution shell are shown in parentheses.
